# Supplementary material
Source: publisher site journal article supplement (https://www.dovepress.com/article/289398)
Supplement: Supplementary file 1 [file get_supplementary_file.php]

**Supplemental Figure 1. Development process for CAD decision making quality survey.**

**Supplemental Data 1. Survey materials used for study**

What You Have Heard

*Please think about what your doctor(s) and their staff told you about treatment for heart disease.*

For each question in the next section (items 1 to 6), please check the one box that best describes your conversation(s).

|  | A lot | Some | A little | Not at all |
| --- | --- | --- | --- | --- |
| 1. My doctor(s) and staff explained the *benefits* of treating my heart disease by taking medicines alone. | □ | □ | □ | □ |
| 2. My doctor(s) and staff explained the *risks* of treating my heart disease by taking medicines alone. | □ | □ | □ | □ |
| 3. My doctor(s) and staff explained the *benefits* of treating my heart disease by having an angioplasty (stent procedure). | □ | □ | □ | □ |
| 4. My doctor(s) and staff explained the *risks* of treating my heart disease by having an angioplasty (stent procedure). | □ | □ | □ | □ |
| 5. My doctor(s) and staff explained the *benefits* of treating my heart disease by having bypass surgery. | □ | □ | □ | □ |
| 6. My doctor(s) and staff explained the *risks* of treating my heart disease by having bypass surgery. | □ | □ | □ | □ |

What You Have Learned About Treatments

*These are general questions about heart disease and treatment for heart disease. You may have heard about some of this information from your doctor(s), their staff, other people, or read about it.*

|  | True | False | Don’t know |
| --- | --- | --- | --- |
| 7. Most patients have more than one treatment option for their heart disease – which may include taking medicines alone, an angioplasty (stent procedure), and bypass  surgery. | □ | □ | □ |

1. If a patient has taken medicines alone to treat their heart disease:

|  | True | False | Don’t know |
| --- | --- | --- | --- |
| a. They will be more likely to have a future heart attack than if they had an angioplasty (stent procedure). | □ | □ | □ |
| b. They will be more likely to need a procedure (angioplasty or bypass surgery) in the future. | □ | □ | □ |
| c. In a few years, they are as likely to be free of their chest pain (angina) as those that had an angioplasty (stent procedure). | □ | □ | □ |

1. If a patient has an angioplasty (stent procedure):

|  | True | False | Don’t know |
| --- | --- | --- | --- |
| a. They usually have faster relief of heart disease  symptoms than if they had taken medicines alone. | □ | □ | □ |
| b. They no longer need to take any medicines to treat  their heart disease. | □ | □ | □ |
| c. They usually live longer than if they had taken  medicines alone. | □ | □ | □ |

1. If a patient has bypass surgery:

|  | True | False | Don’t know |
| --- | --- | --- | --- |
| a. They will be less likely to need a procedure in the future than if they had an angioplasty (stent procedure) or took medicines alone. | □ | □ | □ |
| b. It will take longer to recover than if they had an angioplasty (stent procedure). | □ | □ | □ |
| c. They may live longer than if they had other treatments for heart disease. | □ | □ | □ |

1. Sometimes the benefits of angioplasty or bypass surgery for heart disease do not last. If so, a heart patient may need another procedure (angioplasty or bypass surgery). Which procedure’s benefits are likely to last longer? Choose the one best answer.

- Angioplasty (stent procedure)
- Bypass surgery
- Little or no difference between the two (angioplasty and bypass surgery)
- Don’t know

1. Which of the following are possible risks of an angioplasty (stent procedure)?

|  | A risk | Not a risk | Don’t know |
| --- | --- | --- | --- |
| a. Allergic reaction to contrast dye medication given during the procedure. | □ | □ | □ |
| b. Needing to have emergency bypass surgery. | □ | □ | □ |
| c. Damage to kidneys. | □ | □ | □ |
| d. Serious bleeding from blood-thinning medicines patients must take after angioplasty (stent procedure). | □ | □ | □ |

Making Decisions About Your Care

1. How much of an effect would you say that *out-of-pocket* costs (costs not covered by insurance) may have on your choice of treatment for your heart disease? Choose the one best answer.

| Major effect | Moderate effect | Minor effect | No effect | I don’t know |
| --- | --- | --- | --- | --- |
| □ | □ | □ | □ | □ |

1. How do you want treatment decisions for your heart disease made? Choose the one answer that best describes how you feel.
   - I want my doctor to make all the decisions.
   - I want my doctor to listen to my opinion and then make all the decisions.
   - I want us (my doctor and me) to make all the decisions together after talking about the treatment choices.
   - I want to make all the decisions myself after listening to my doctor’s recommendation.
   - I want to make all the decisions myself.
2. As this questionnaire suggests, there are both possible benefits and risks of different treatments for heart disease. Based on what you know today of the risks and benefits of each, if you had to make a choice between the following three treatments, which one would you choose?

- Taking medicines alone
- Having an angioplasty (stent procedure)
- Having bypass surgery
- I don’t know

Your Heart Symptoms

*This section of the survey is about your recent heart symptoms and your medical history.*

1. The following is a list of activities that people often do during the week. Although for some people with several medical problems it is difficult to determine what it is that limits them, please go over the activities listed below and indicate how much limitation you have had due to *chest pain, chest tightness or angina* over the past 4 weeks.

| Activity | Extremely limited | Quite a bit limited | Moderately limited | Slightly limited | Not at all limited | Limited for other reasons or did not do the activity |
| --- | --- | --- | --- | --- | --- | --- |
| a. Walking indoors on level ground | □ | □ | □ | □ | □ | □ |
| b. Gardening, vacuuming or carrying groceries | □ | □ | □ | □ | □ | □ |
| c. Lifting or moving heavy objects (e.g. furniture, children) | □ | □ | □ | □ | □ | □ |

1. Over the past 4 weeks, on average, how many times have you had *chest pain, chest tightness or angina*?

I have had *chest pain, chest tightness or angina…*

| 4 or more times per day | 1-3 times per day | 3 or more times per week, but not every day | 1-2 times per week | Less than once a week | None over the past 4 weeks |
| --- | --- | --- | --- | --- | --- |
| □ | □ | □ | □ | □ | □ |

1. Over the past 4 weeks, on average, how many times have you had to take nitroglycerin (nitroglycerin tablets or spray) for your *chest pain, chest tightness or angina*?

I have taken nitroglycerin…

| 4 or more times per day | 1-3 times per day | 3 or more times per week, but not every day | 1-2 times per week | Less than once a week | None over the past 4 weeks |
| --- | --- | --- | --- | --- | --- |
| □ | □ | □ | □ | □ | □ |

1. Over the past 4 weeks, how much has your *chest pain, chest tightness or angina* limited your enjoyment of life?

| It has *extremely* limited my enjoyment of life | It has limited my enjoyment of life *quite a bit* | It has *moderately* limited my enjoyment of life | It has *slightly* limited my enjoyment of life | It has *not* limited my enjoyment of life at all |
| --- | --- | --- | --- | --- |
| □ | □ | □ | □ | □ |

1. If you had to spend the rest of your life with your *chest pain, chest tightness or angina* the way it is right now, how would you feel about this?

| Not satisfied at all | Mostly dissatisfied | Somewhat dissatisfied | Mostly satisfied | Completely satisfied |
| --- | --- | --- | --- | --- |
| □ | □ | □ | □ | □ |

1. Please think about how you have been feeling this past month. Do you get short of breath…

|  | Yes | No |
| --- | --- | --- |
| a. …when hurrying on level ground or walking up a slight hill? | □ | □ |
| b. …when walking with other people your own age on level ground? | □ | □ |
| c. …when walking at your own pace on level ground? | □ | □ |
| d. …when washing or dressing? | □ | □ |

Your Medical History

|  | | | | Yes | No |
| --- | --- | --- | --- | --- | --- |
| 31. Have you ever had a heart attack (myocardial infarction)? | | | | □ | □ |
| 32. Before this visit or hospitalization, have you ever had a cardiac catheterization, also known as an angiogram, to diagnose your heart disease? | | | | □ | □ |
| 33. Before this visit or hospitalization, have you ever been treated with a stent (also known as percutaneous coronary intervention or angioplasty)? | | | | □ | □ |
| 34. Before this visit or hospitalization, have you ever been treated with bypass surgery (coronary artery bypass graft)? | | | | □ | □ |
| 35. Are you currently taking any medications to control your heart disease symptoms (e.g. beta blockers, nitroglycerin, aspirin, etc.)? | | | | □ | □ |
| If YES, for how long? | □�1 week | □1-4 weeks | □>4 weeks |  |  |
| 36. Have you ever been told you have diabetes (high blood sugar)? | | | | □ | □ |
| 37. Have you ever been told that you have heart failure (heart not pumping normally)? | | | | □ | □ |
| 1. Please check below the provider(s) with whom you had conversations about your treatment for heart disease. We are not trying to determine which were most helpful; simply which types of providers gave you information about your treatment. (Check ALL that apply)    - Cardiologist    - Cardiac surgeon    - Regular physician (General Medicine, Internal Medicine, Family Practice, etc.)    - Other physicians    - Other health professionals (for example, nurses or health coaches)    - No physicians or health professionals | | | | | |

# Patient Study ID

| About You |
| --- |
| 39. Age: |
| 40. Gender: □Female □Male □Other |
| 1. What is your current marital status?    - Single, never married    - Married or living with a partner    - Separated or divorced    - Widowed |
| 42. Are you of Hispanic or Latino origin or descent? □YES □NO |
| 1. What is your race? (Check ALL that apply)    - Black or African American    - White    - Asian    - Native Hawaiian or other Pacific Islander    - American Indian or Alaska Native    - Other |
| 1. Please choose the category that best describes your highest level of education.    - 8th grade or less    - Some high school, but did not graduate    - High school graduate or GED    - Some college or 2-year degree    - 4-year college graduate    - More than 4-year college degree |
| 1. Please tell us about your health insurance coverage.    - Medicare only    - Medicare + supplemental insurance plan    - Medicare + Medicaid    - Medicaid only    - Commercial health insurance    - Military health plan    - Indian Health Service    - Self-pay/No insurance    - Other |

DeQCAD Patient Questionnaire


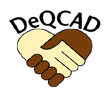
End of survey.
